# Supplementary material for: Korean Variant Archive (KOVA): a reference database of genetic variations in the Korean population
Source: PubMed Central journal article supplement (PMC5487339; doi:10.1038/s41598-017-04642-4), 2017-06-27
Supplement: 41598_2017_4642_MOESM1_ESM.pdf [file 41598_2017_4642_MOESM1_ESM.pdf]

## SUPPLEMENTARY INFORMATION

### **Korean Variant Archive (KOVA): a reference database of genetic variations in the Korean population**

Sangmoon Lee<sup>1,14</sup>, Jihae Seo<sup>2,14</sup>, Jinman Park<sup>3,4,14</sup>, Jae-Yong Nam<sup>5,6,14</sup>, Ahyoung Choi<sup>2,7</sup>, Jason S Ignatius<sup>8</sup>, Robert D Bjornson<sup>9</sup>, Jong-Hee Chae<sup>10</sup>, In-Jin Jang<sup>11</sup>, Sanghyuk Lee<sup>2,7</sup>, Woong-Yang Park<sup>5,6,12</sup>, Daehyun Baek<sup>3,4,13,\*</sup>, and Murim Choi<sup>1,\*</sup>

<sup>1</sup>Department of Biomedical Sciences, Seoul National University College of Medicine, Seoul 03080, Republic of Korea

<sup>2</sup>Ewha Research Center for Systems Biology (ERCSB), Ewha Womans University, Seoul 03760, Republic of Korea

<sup>3</sup>Center for RNA Research, Institute for Basic Science, Seoul 08826, Republic of Korea.

<sup>4</sup>School of Biological Sciences, Seoul National University, Seoul 08826, Republic of Korea.

<sup>5</sup>Samsung Genome Institute, Samsung Medical Center, Seoul 06351, Republic of Korea

<sup>6</sup>Department of Health Sciences and Technology, Samsung Advanced Institute of Science and Health Technology, Sungkyunkwan University, Seoul 06351, Republic of Korea

<sup>7</sup>Department of Bio-Information Science, Ewha Womans University, Seoul 03760, Republic of Korea

<sup>8</sup>Yale Center for Research Computing, Yale University, New Haven, CT 06511, USA.

<sup>9</sup>Department of Computer Science and Yale Center for Research Computing, Yale University, New Haven, CT 06511, USA.

<sup>10</sup>Department of Pediatrics, Seoul National University Children's Hospital, Seoul National University College of Medicine, Seoul 03080, Republic of Korea.

<sup>11</sup>Department of Clinical Pharmacology and Therapeutics, Seoul National University College of Medicine and Seoul National University Hospital, Seoul 03080, Republic of Korea

<sup>12</sup>Department of Molecular Cell Biology, Sungkyunkwan University School of Medicine, Suwon 16419, Republic of Korea

<sup>13</sup>Bioinformatics Institute, Seoul National University, Seoul 08826, Republic of Korea.

<sup>14</sup>These authors contributed equally to this work

\*These authors contributed equally to this work

Correspondence to:

Daehyun Baek, Ph.D.

School of Biological Sciences, Seoul National University, 1 Gwanak-ro, Gwanak-gu, Seoul 08826, Republic of Korea.

Tel: +82-2-880-4264

E-mail: baek@snu.ac.kr

or

Murim Choi, Ph.D.

Department of Biomedical Sciences, Seoul National University College of Medicine, 103 Daehak-ro, Jongno-gu, Seoul 03080, Republic of Korea

Tel: +82-2-740-8912

Fax: +82-2-3673-2167

E-mail: murimchoi@snu.ac.kr

**Running Title:** Profile of coding variants from 1,055 Korean individuals

## **Supplementary Methods**

### *Power simulation of KOVA*

We also simulated power of the KOVA database in analyzing actual Korean exome data. WES from 16 Korean patients with congenital neurologic diseases were processed through the same pipeline as KOVA, and then the variants reported in ExAC were filtered out. The number of variants remaining after removing variants from randomly selected sample sets from KOVA were counted.

### *Relatedness among individuals*

Relatedness among individuals was checked by vcfTools (version 0.1.15) with --relatedness option.<sup>1,2</sup> Pairs of samples with the output value over 0.1 were regarded as related and excluded.

### *ClinVar analysis*

For ClinVar analysis, variants annotated as pathogenic in clinvar\_20150629 database were used for further analysis.

## References

1. Yang, L. *et al.* Analyzing Somatic Genome Rearrangements in Human Cancers by Using Whole-Exome Sequencing. *Am. J. Hum. Genet.* **98**, 843–856 (2016).
2. Danecek, P. *et al.* The variant call format and VCFtools. *Bioinformatics* **27**, 2156–2158 (2011).

## Supplementary Figures

**a**

Average Depth of Coverage

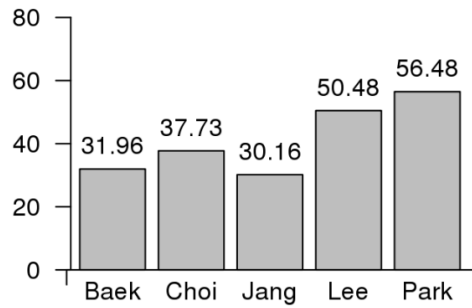

**b**

Average Genotype Quality

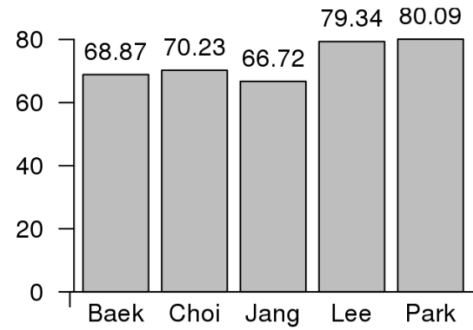

**c**

Ti/Tv Ratio (Alt allele count=0)

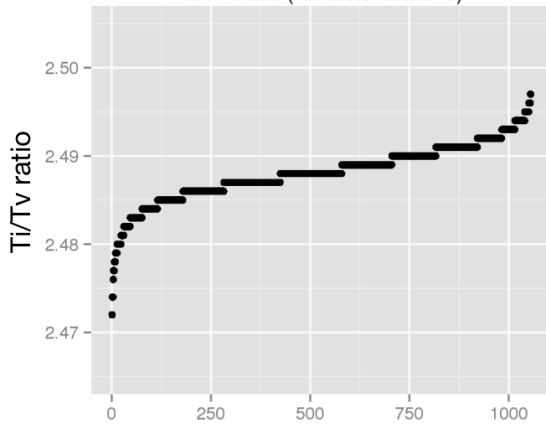

**d**

Het/Hom Ratio

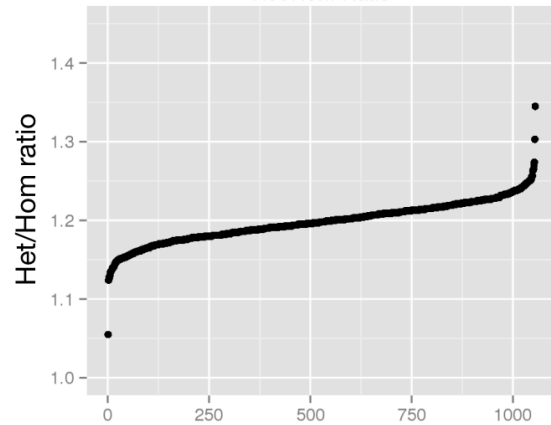

**Supplementary Figure S1. Quality control of KOVA. (a)** Average depth of coverage of variants. **(b)** Average genotype quality. **(c)** Transition/transversion ratio of variants. **(d)** Heterozygous/homozygous ratio of variants.

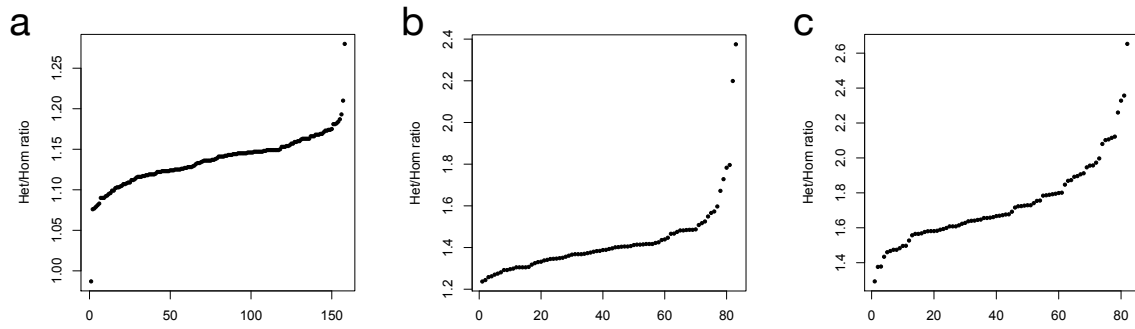

**Supplementary Figure S2.** Hetero-to-homozygosity ratios of 1000 Genomes Project data analyzed by KOVA pipeline. **(a)** East Asians (n = 158, median = 1,14) **(b)** European (n = 83, median = 1.39) **(c)** African (n = 82, median = 1.67)

**a**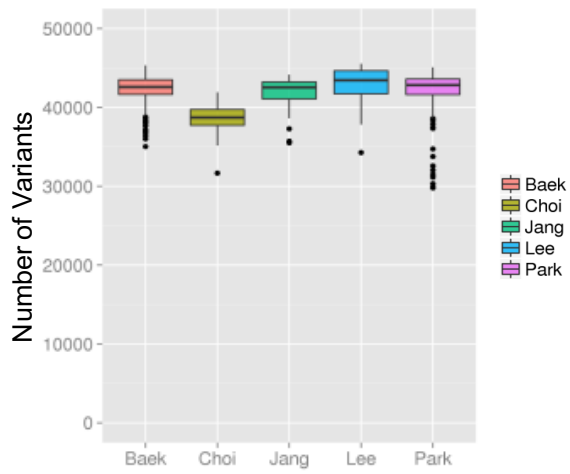**b**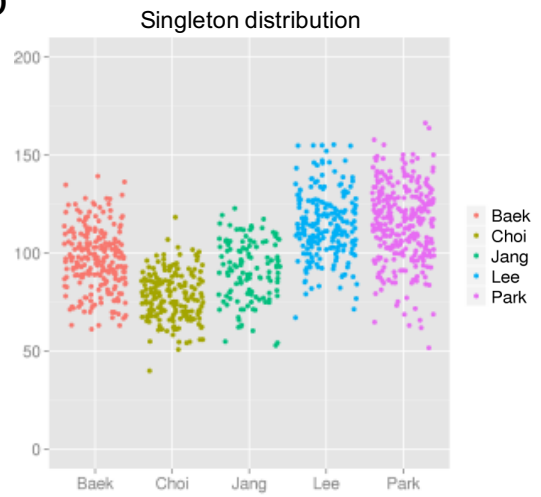

**Supplementary Figure S3.** Sample-wise number of (a) total variants and (b) singleton variants.



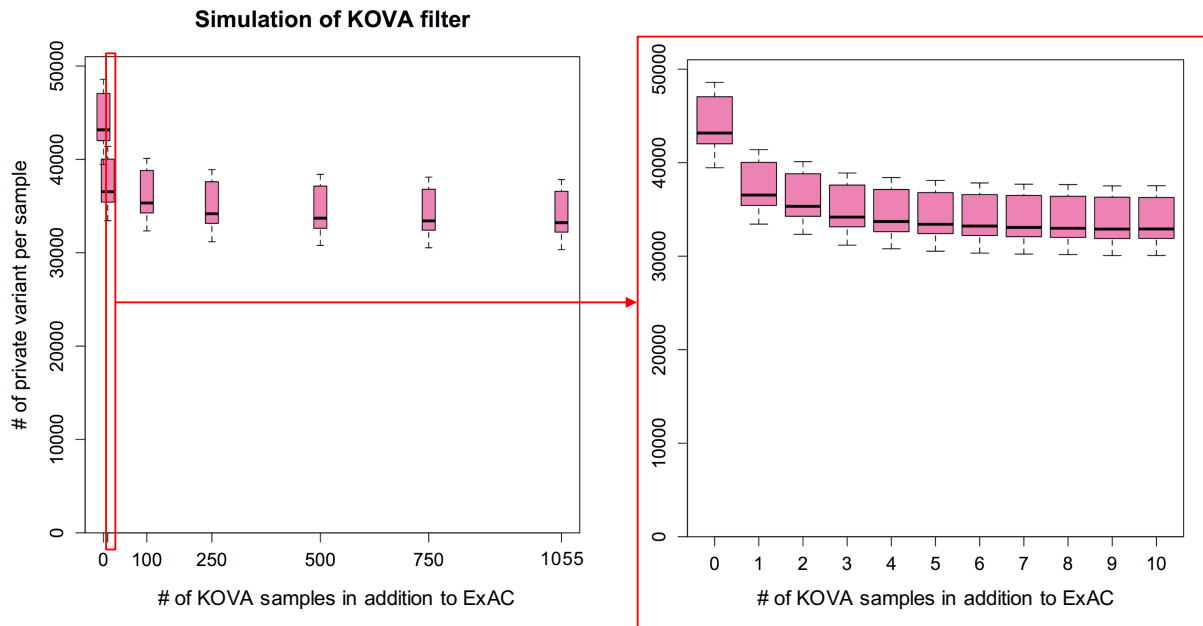

**Supplementary Figure S4.** Simulation of increasing number of KOVA samples as a filtering option additional to ExAC for independent Korean cohort. Sample number of cohort is 16.

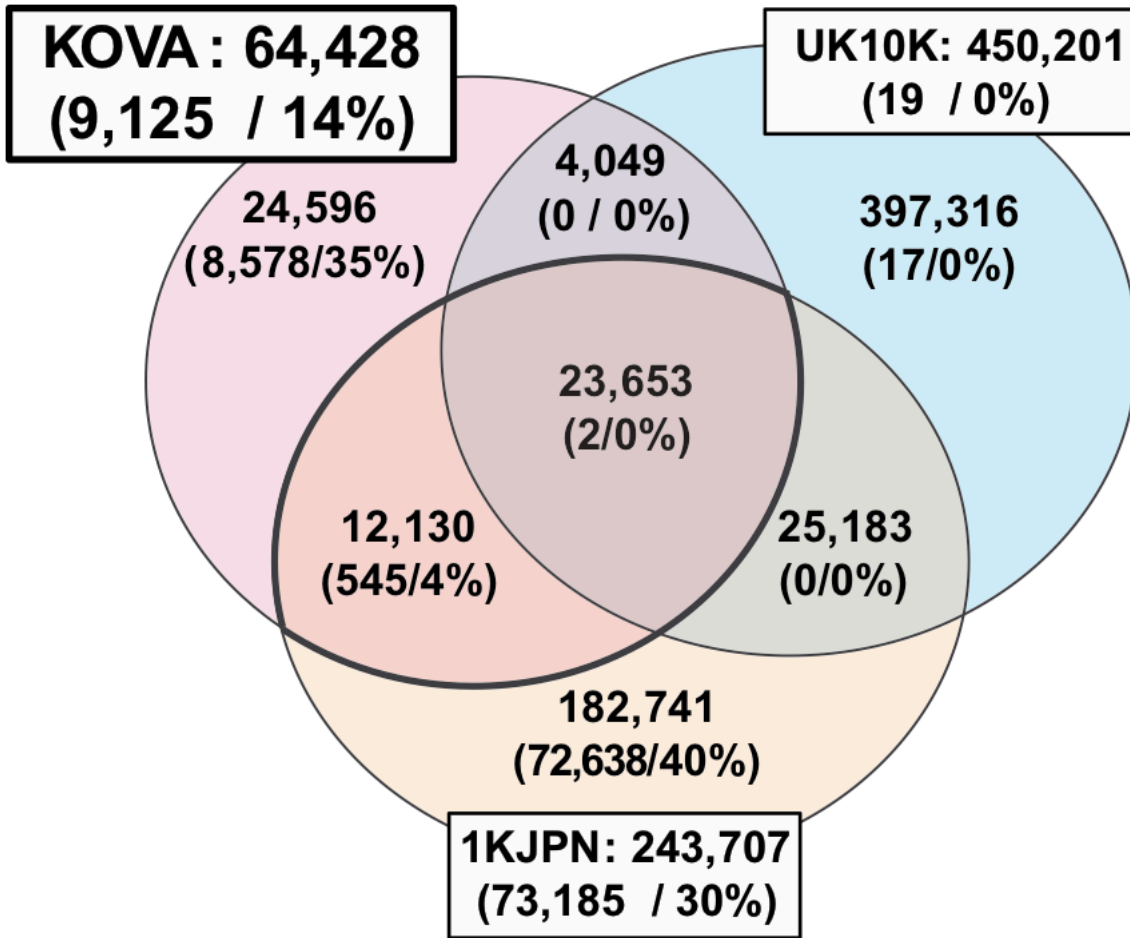

**Supplementary Figure S5.** Venn diagram of coding variant comparisons among KOVA, Japanese population (1KJPN), and UK10K. Numbers and proportion of novel variants (i.e. not registered in dbSNP build 147) in each area are shown in the parentheses.

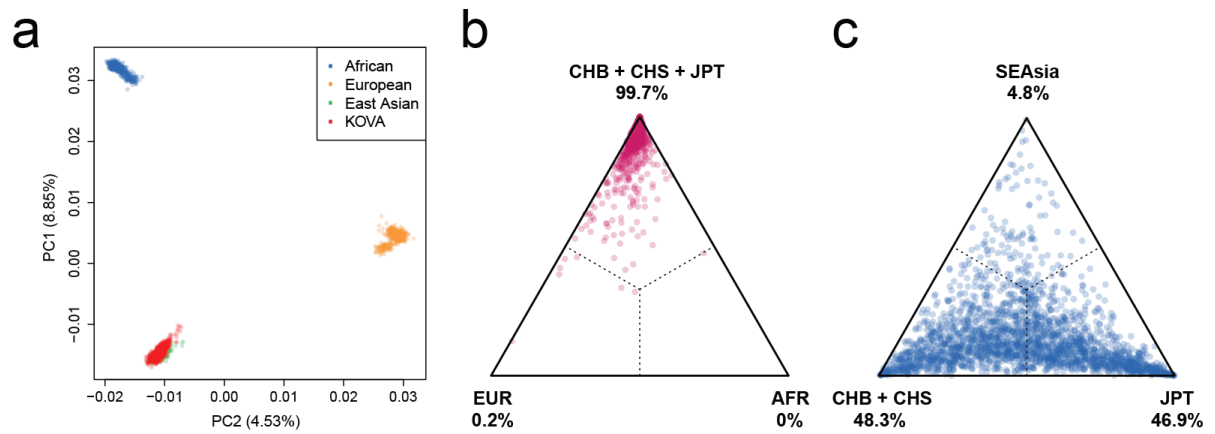

**Supplementary Figure S6. Principal component analysis and 0.5Mb-windowed fixation index ( $F_{ST}$ ) of KOVA and other ethnic groups.** (a) Principal component analysis of KOVA and other populations of 1000 Genomes Project. 0.5Mb-windowed variant-level  $F_{ST}$  between KOVA and (b) East Asian, European, and African, and (c) Chinese, Japanese, and Southeast Asian.

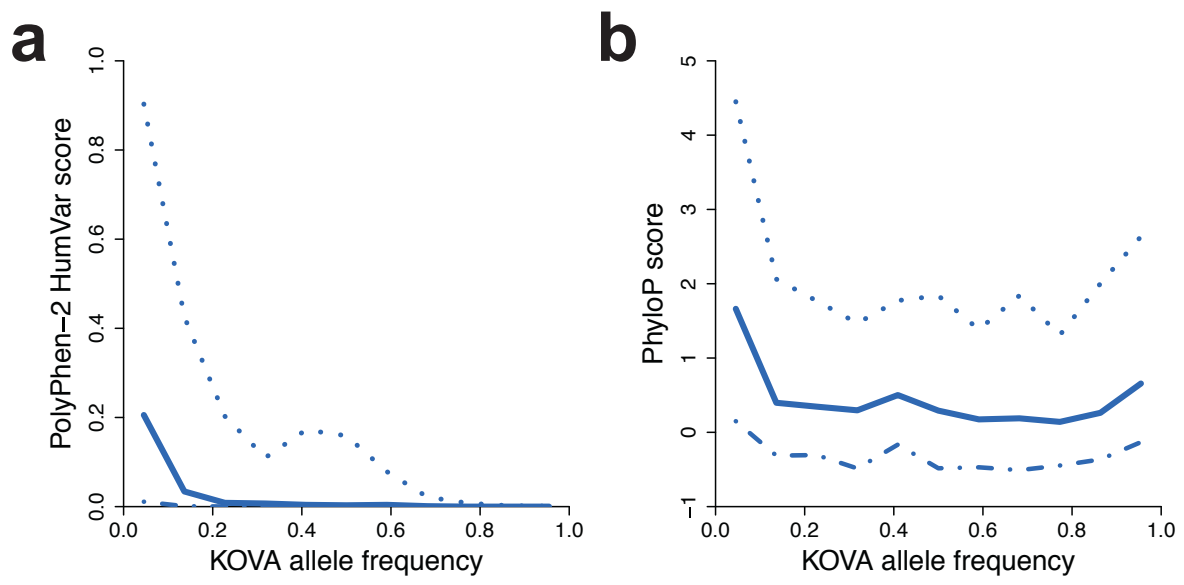

**Supplementary Figure S7.** Functional analysis of nonsynonymous variants. **(a)** PolyPhen-2 HumVar and **(b)** PhyloP score distributions by allele frequencies.

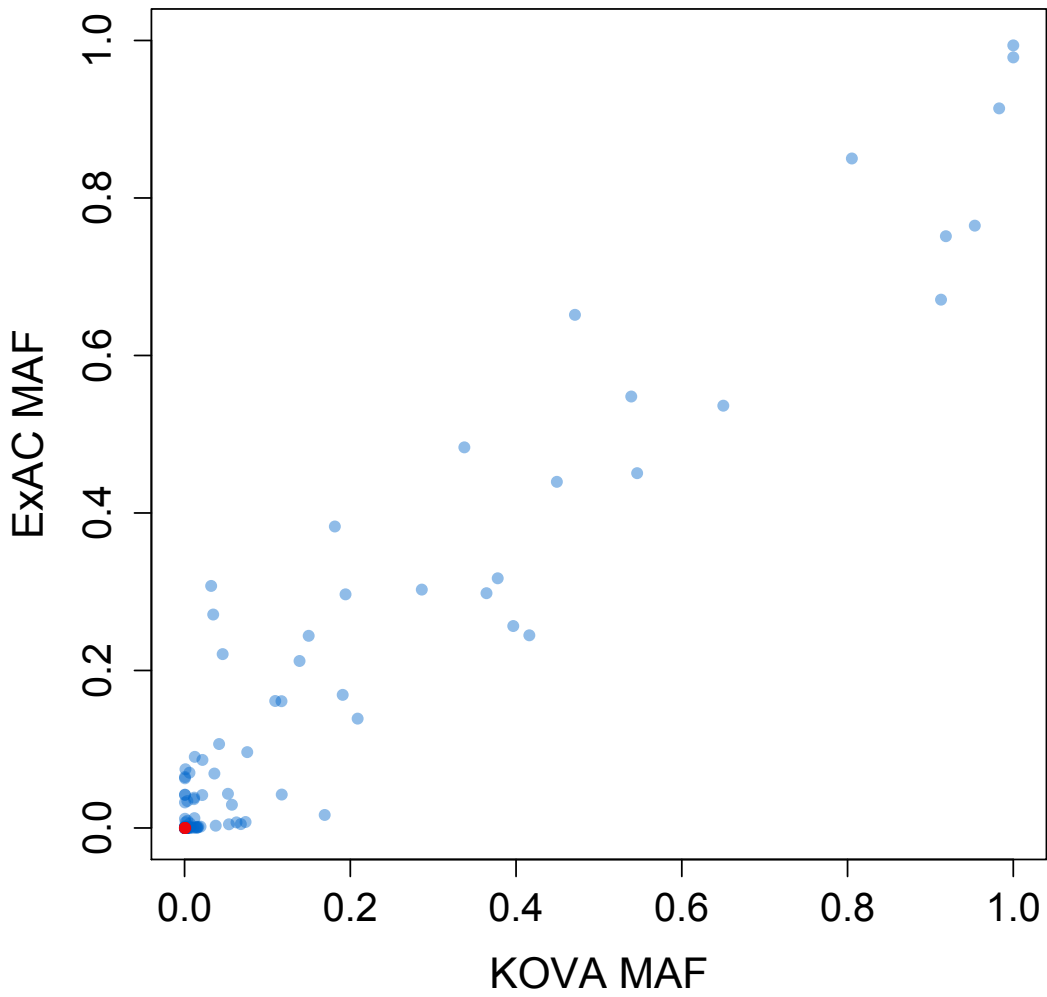

**Supplementary Figure S8.** Minor allele frequency comparison of variants annotated as pathogenic in ClinVar between KOVA and ExAC. ExAC: Exome Aggregation Consortium, MAF: Minor allele frequency.

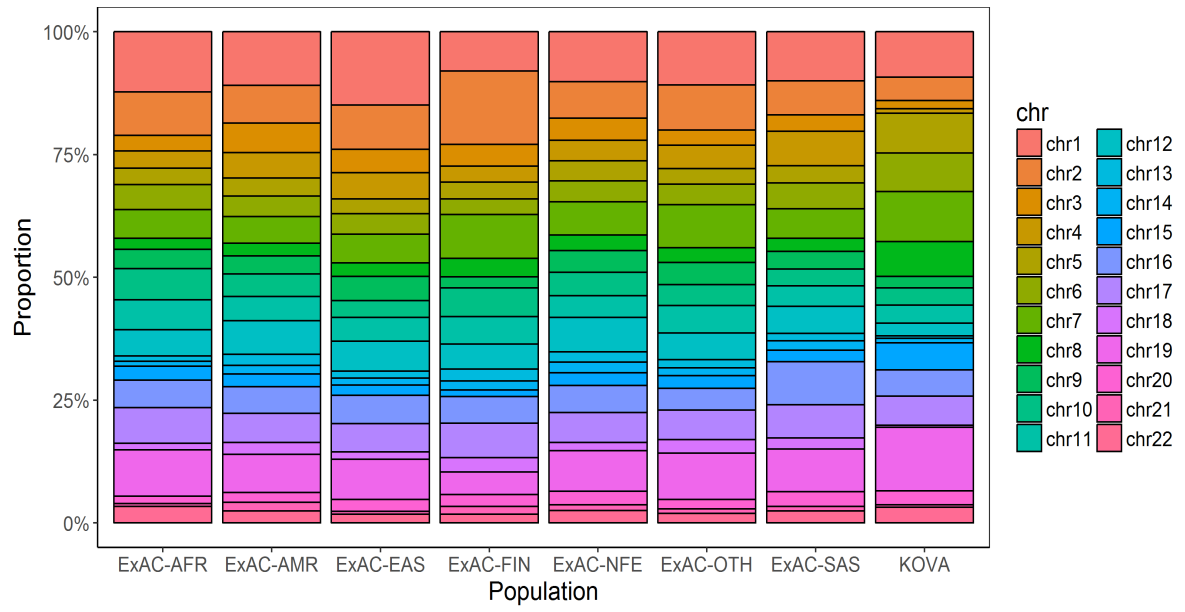

**Supplementary Figure S9.** CNV count distribution of each chromosome in ExAC and KOVA.

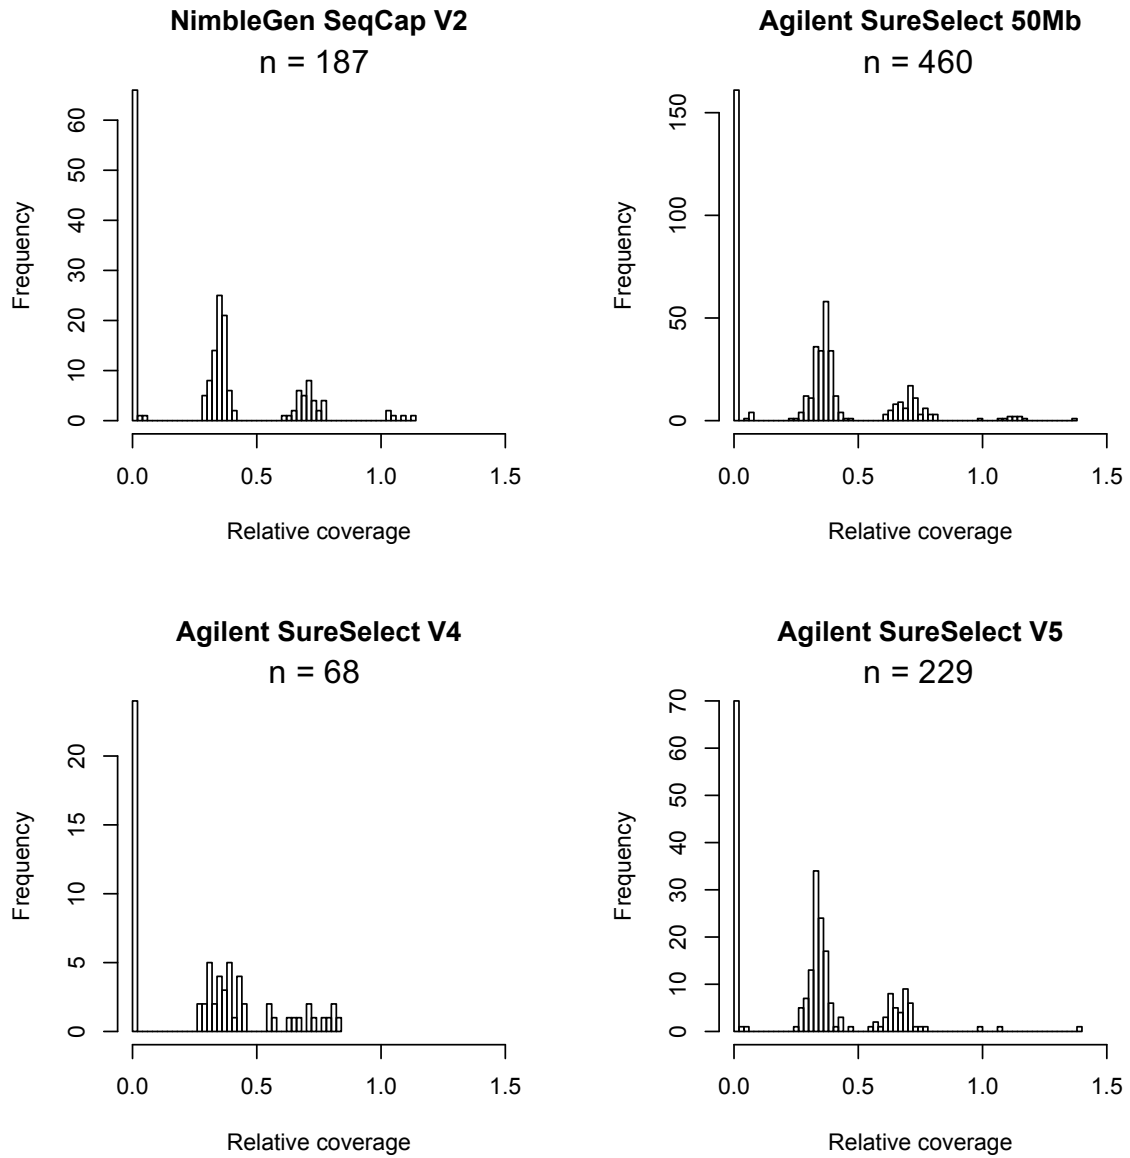

**Supplementary Figure S10.** Relative coverage of *SIGLEC14* locus to mean coverage of chromosome 19 by exome capture platforms.

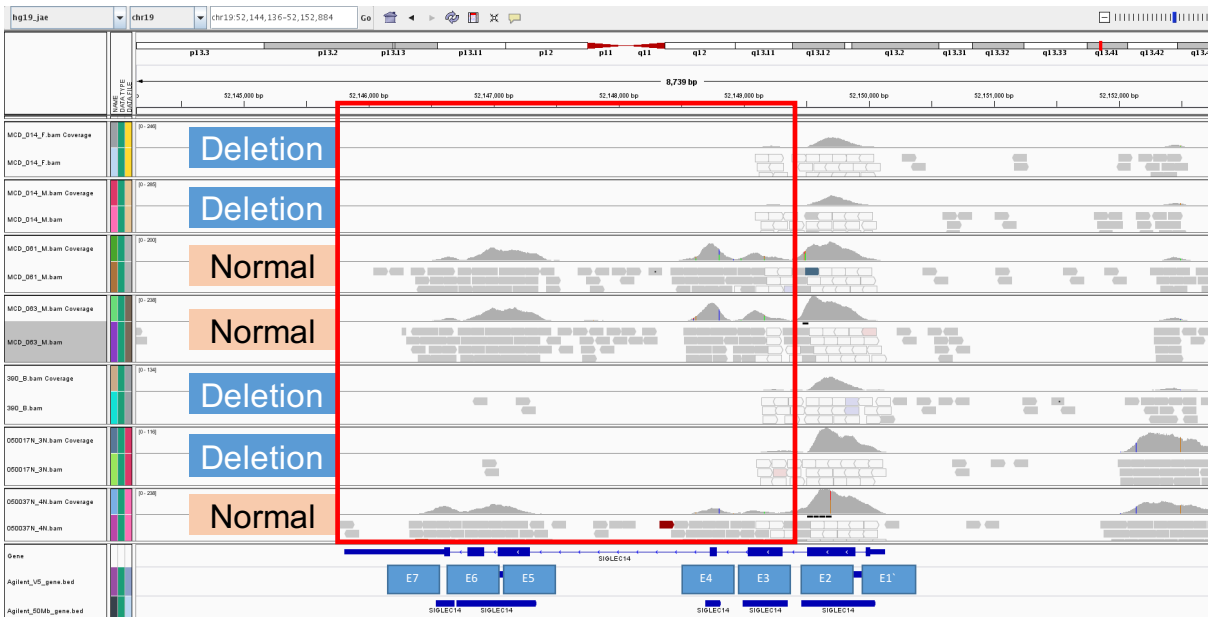

**Supplementary Figure S11.** Example of IGV snapshot of *SIGLEC14* deletion.



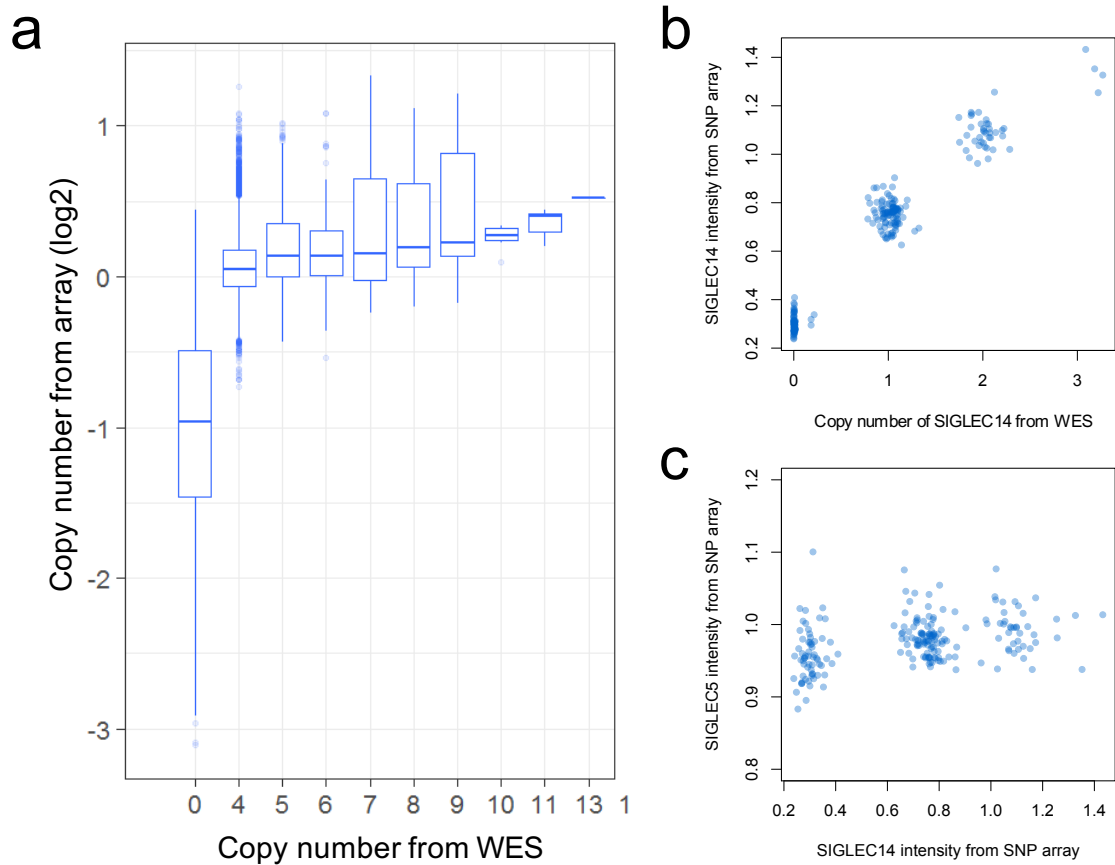

**Supplementary Figure S12.** KOVA copy number variation validated by SNP array.

(a) Correlation of copy numbers (CNs) between KOVA and corresponding SNP array (Correlation = 0.43,  $P < 2.0 \times 10^{-16}$ ). (b) CNs of *SIGLEC14* estimated by WES data is very well concordant with that by SNP array. (c) CNs of *SIGLEC14* and *SIGLEC5* predicted by SNP array.

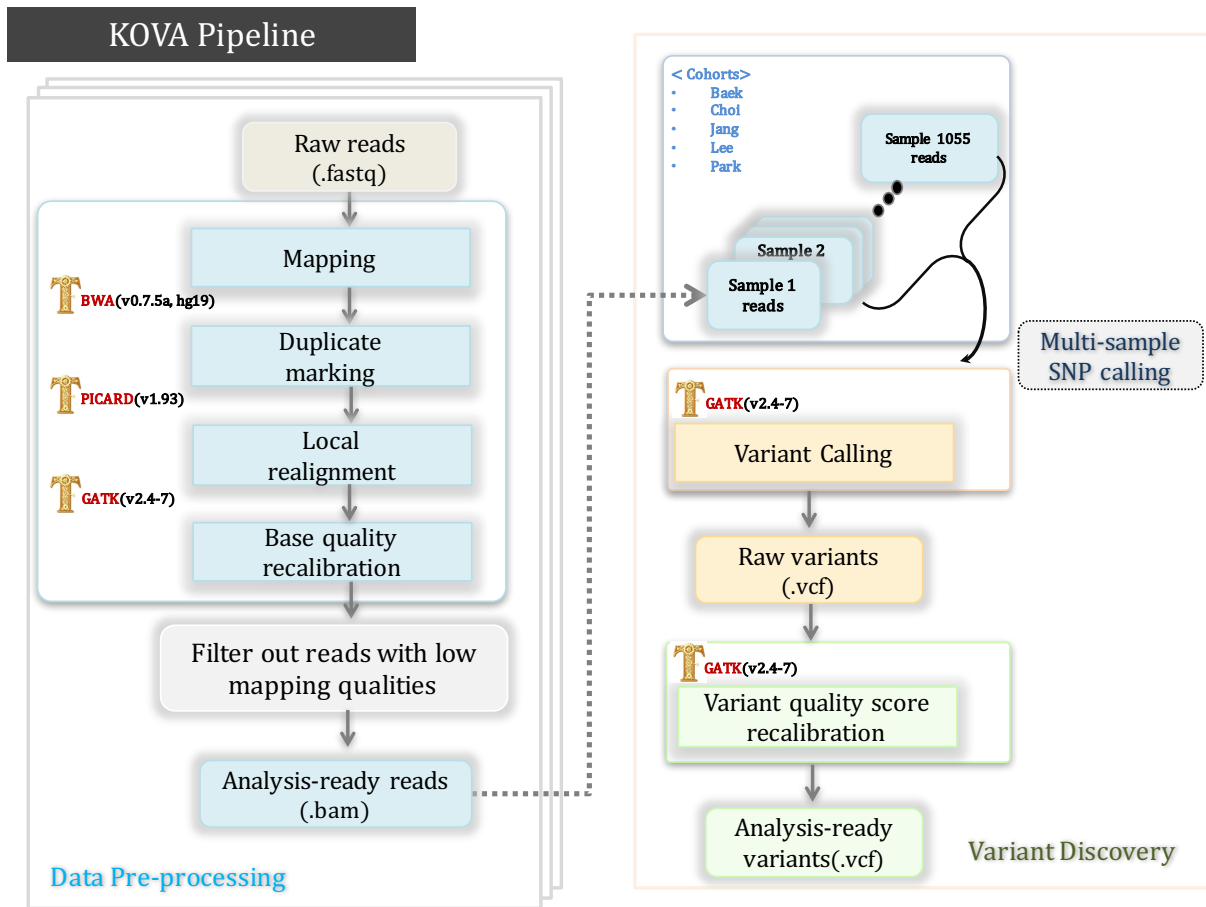

**Supplementary Figure S13. Whole exome sequencing pipeline that used in this study.**

**Supplementary Table S1. Summary of sample cohorts**

| Group | No. of sample | Sample Information                                                                                                                                                                          | Capture platform                                                  | Mean cov. depth |
|-------|---------------|---------------------------------------------------------------------------------------------------------------------------------------------------------------------------------------------|-------------------------------------------------------------------|-----------------|
| Baek  | 237           | Lung adenocarcinoma normal #237                                                                                                                                                             | Agilent SureSelect 50Mb                                           | 54X             |
| Choi  | 190           | Healthy parent of a rare disease pt #166<br>Cancer normal #23<br>Healthy person #1                                                                                                          | Roche V2                                                          | 71X             |
| Jang  | 123           | Healthy person #123                                                                                                                                                                         | Agilent SureSelect 50Mb                                           | 51X             |
| Lee   | 214           | Lung adenocarcinoma normal #127<br>Stomach cancer normal #76<br>Normal #11                                                                                                                  | Agilent SureSelect 50Mb<br>Agilent SureSelect V4                  | 93X             |
| Park  | 291           | Breast cancer normal #137<br>Healthy parent of a rare disease pt #77<br>Glioblastoma normal #62<br>Colorectal cancer normal #13<br>Healthy family of hearing loss pt#1<br>Healthy person #1 | Illumina TruSeq<br>Agilent SureSelect V4<br>Agilent SureSelect V5 | 109X            |
| Total | 1055          |                                                                                                                                                                                             |                                                                   | 75X             |

**Supplementary Table S2. Distribution of Minor Allele Frequency in KOVA**

| <b>MAF</b>                  | <b>No. of variants</b> | <b>%</b> | <b>Known</b> | <b>Novel</b> | <b>% novel</b> |
|-----------------------------|------------------------|----------|--------------|--------------|----------------|
| Singleton                   | 106,826                | 36.45    | 41,491       | 65,335       | 61.16          |
| Singleton < MAF $\leq$ 0.01 | 85,978                 | 29.34    | 63,481       | 22,497       | 26.17          |
| 0.01 < MAF $\leq$ 0.05      | 24,108                 | 8.23     | 23,920       | 188          | 0.78           |
| 0.05 < MAF $\leq$ 0.1       | 11,253                 | 3.84     | 11,247       | 6            | 0.05           |
| 0.1 < MAF $\leq$ 0.2        | 14,037                 | 4.79     | 14,033       | 4            | 0.03           |
| 0.2 < MAF $\leq$ 0.3        | 9,803                  | 3.35     | 9,802        | 1            | 0.01           |
| 0.3 < MAF $\leq$ 0.4        | 7,590                  | 2.59     | 7,588        | 2            | 0.03           |
| 0.4 < MAF $\leq$ 0.5        | 6,437                  | 2.20     | 6,437        | 0            | 0              |
| 0.5 < MAF $\leq$ 0.6        | 5,377                  | 1.83     | 5,375        | 2            | 0.04           |
| 0.6 < MAF $\leq$ 0.7        | 4,797                  | 1.64     | 4,797        | 0            | 0              |
| 0.7 < MAF $\leq$ 0.8        | 3,965                  | 1.35     | 3,965        | 0            | 0              |
| 0.8 < MAF $\leq$ 0.9        | 3,861                  | 1.32     | 3,859        | 2            | 0.05           |
| 0.9 > MAF                   | 9,017                  | 3.08     | 9,007        | 10           | 0.11           |
| Total                       | 293,049                | 100.00   | 205,002      | 88,047       | 30.05          |

MAF; Minor allele frequency

**Supplementary Table S3. Summary of copy number variations in each group**

| Group | # of samples | Average # of amp. | Average # of del. | Amp. mean length (Kb) | Del. mean length (Kb) | Amp. median length (Kb) | Del. median length (Kb) |
|-------|--------------|-------------------|-------------------|-----------------------|-----------------------|-------------------------|-------------------------|
| Baek  | 211          | 12                | 5                 | 9.6                   | 5.9                   | 2.8                     | 2.4                     |
| Choi  | 187          | 5                 | 3                 | 9.5                   | 4.5                   | 2.9                     | 2.0                     |
| Jang  | 118          | 11                | 5                 | 11.2                  | 5.6                   | 2.8                     | 2.8                     |
| Lee   | 199          | 10                | 10                | 10.8                  | 12.6                  | 2.8                     | 3.1                     |
| Park  | 229          | 12                | 4                 | 15.1                  | 3.7                   | 1.3                     | 1.0                     |

## Supplementary Table S4. Rare variants that were enriched in “tumor-paired normals” compared to “healthy normals” for lung cancer

| Chromosome | Position    | dbSNP142    | Reference | Alternative | Minor allele frequency |             |            |           |            |
|------------|-------------|-------------|-----------|-------------|------------------------|-------------|------------|-----------|------------|
|            |             |             |           |             | KOVA:cancer            | KOVA:normal | 1000GP:EAS | TCGA:LUAD | 1000GP:EUR |
| chr1       | 7,880,683   | rs10462020  | T         | G           | 0.014                  | 0.007       | 0.008      | 0.162     | 0.197      |
| chr2       | 24,439,048  | rs3731625   | A         | G           | 0.100                  | 0.060       | 0.001      | 0.083     | 0.000      |
| chr3       | 32,578,505  | rs2303857   | T         | C           | 0.040                  | 0.026       | 0.054      | 0.109     | 0.098      |
| chr3       | 45,814,094  | rs17279437  | G         | A           | 0.012                  | 0.004       | 0.000      | 0.066     | 0.000      |
| chr3       | 49,736,537  | rs77308703  | C         | T           | 0.034                  | 0.022       | 0.000      | 0.002     | 0.000      |
| chr3       | 178,968,634 | rs7645550   | C         | T           | 0.091                  | 0.060       | 0.123      | 0.415     | 0.371      |
| chr4       | 108,969,883 | rs4365796   | G         | A           | 0.026                  | 0.015       | 0.000      | 0.002     | 0.000      |
| chr4       | 178,256,913 | rs7689099   | C         | G           | 0.021                  | 0.011       | 0.026      | 0.162     | 0.118      |
| chr5       | 79,029,594  | rs1019762   | T         | C           | 0.030                  | 0.004       | 0.000      | 0.133     | 0.002      |
| chr5       | 141,025,730 | rs77115131  | T         | G           | 0.043                  | 0.015       | 0.035      | 0.024     | 0.032      |
| chr5       | 154,346,296 | rs3749671   | G         | A           | 0.059                  | 0.037       | 0.053      | 0.044     | 0.040      |
| chr5       | 168,123,398 | rs2305993   | T         | C           | 0.019                  | 0.004       | 0.008      | 0.002     | 0.001      |
| chr6       | 26,157,073  | rs2298090   | A         | G           | 0.026                  | 0.007       | 0.013      | 0.007     | 0.012      |
| chr6       | 29,395,057  | rs16894898  | T         | C           | 0.055                  | 0.022       | 0.030      | 0.009     | 0.000      |
| chr6       | 32,784,676  | rs2071554   | C         | T           | 0.113                  | 0.071       | 0.060      | 0.050     | 0.050      |
| chr6       | 52,101,758  | rs11465553  | C         | T           | 0.014                  | 0.007       | 0.000      | 0.044     | 0.000      |
| chr7       | 44,104,788  | rs61756062  | A         | C           | 0.038                  | 0.022       | 0.039      | 0.011     | 0.004      |
| chr7       | 103,292,112 | rs115734214 | T         | G           | 0.026                  | 0.015       | 0.029      | 0.028     | 0.032      |
| chr7       | 138,417,791 | rs3807153   | A         | G           | 0.045                  | 0.026       | 0.000      | 0.039     | 0.000      |
| chr8       | 27,362,587  | rs57699806  | G         | A           | 0.018                  | 0.011       | 0.061      | 0.004     | 0.000      |
| chr8       | 144,130,643 | rs78140118  | G         | A           | 0.021                  | 0.011       | 0.020      | 0.004     | 0.000      |
| chr9       | 136,305,530 | rs28647808  | C         | G           | 0.022                  | 0.007       | 0.020      | 0.092     | 0.083      |
| chr10      | 21,134,282  | rs41277370  | C         | G           | 0.019                  | 0.004       | 0.001      | 0.076     | 0.000      |
| chr10      | 48,388,228  | rs11204213  | C         | T           | 0.033                  | 0.015       | 0.042      | 0.002     | 0.001      |
| chr10      | 94,714,427  | rs11187225  | C         | G           | 0.012                  | 0.004       | 0.004      | 0.107     | 0.102      |
| chr10      | 95,441,272  | rs11187583  | G         | A           | 0.025                  | 0.011       | 0.034      | 0.098     | 0.119      |
| chr11      | 5,510,688   | rs7101919   | T         | C           | 0.070                  | 0.041       | 0.000      | 0.323     | 0.007      |
| chr11      | 102,988,504 | rs12146610  | A         | T           | 0.012                  | 0.007       | 0.007      | 0.061     | 0.067      |
| chr12      | 7,842,587   | rs2302516   | C         | G           | 0.040                  | 0.022       | 0.059      | 0.033     | 0.023      |
| chr12      | 89,916,811  | rs2230283   | C         | T           | 0.159                  | 0.105       | 0.137      | 0.288     | 0.353      |
| chr13      | 97,484,830  | rs9516771   | A         | G           | 0.012                  | 0.007       | 0.021      | 0.068     | 0.049      |
| chr13      | 108,863,609 | rs1805389   | G         | A           | 0.111                  | 0.067       | 0.100      | 0.046     | 0.059      |
| chr14      | 20,612,763  | rs10141025  | G         | A           | 0.066                  | 0.041       | 0.033      | 0.002     | 0.000      |
| chr14      | 22,038,001  | rs80295194  | C         | T           | 0.056                  | 0.026       | 0.029      | 0.002     | 0.001      |
| chr14      | 23,549,285  | rs3751501   | G         | A           | 0.098                  | 0.052       | 0.139      | 0.052     | 0.050      |
| chr14      | 68,251,991  | rs3742885   | G         | A           | 0.164                  | 0.108       | 0.124      | 0.024     | 0.018      |
| chr14      | 94,756,458  | rs2232699   | A         | T           | 0.034                  | 0.022       | 0.030      | 0.002     | 0.000      |
| chr15      | 81,234,287  | rs16972583  | C         | G           | 0.029                  | 0.007       | 0.015      | 0.002     | 0.000      |
| chr15      | 99,671,765  | rs5030698   | G         | C           | 0.026                  | 0.011       | 0.021      | 0.076     | 0.059      |
| chr16      | 56,936,319  | rs12708965  | C         | T           | 0.030                  | 0.019       | 0.026      | 0.022     | 0.016      |
| chr16      | 81,077,016  | rs2278023   | A         | G           | 0.062                  | 0.037       | 0.049      | 0.002     | 0.003      |
| chr16      | 81,211,496  | rs9935113   | C         | A           | 0.092                  | 0.060       | 0.105      | 0.142     | 0.171      |
| chr16      | 89,815,152  | rs17233497  | G         | A           | 0.029                  | 0.011       | 0.022      | 0.090     | 0.065      |
| chr17      | 4,352,636   | rs34457931  | G         | A           | 0.063                  | 0.034       | 0.069      | 0.127     | 0.137      |
| chr17      | 8,243,598   | rs73250854  | C         | T           | 0.019                  | 0.011       | 0.000      | 0.118     | 0.000      |
| chr17      | 47,246,163  | rs7224888   | T         | C           | 0.065                  | 0.041       | 0.022      | 0.087     | 0.120      |
| chr17      | 74,019,680  | rs78044548  | C         | T           | 0.021                  | 0.011       | 0.037      | 0.039     | 0.058      |
| chr18      | 11,889,467  | rs11872520  | C         | T           | 0.036                  | 0.015       | 0.025      | 0.004     | 0.003      |
| chr20      | 3,682,126   | rs34924243  | C         | T           | 0.015                  | 0.007       | 0.013      | 0.063     | 0.057      |
| chr20      | 35,507,558  | rs3748460   | G         | A           | 0.034                  | 0.019       | 0.037      | 0.004     | 0.005      |
| chr21      | 31,692,277  | rs3804007   | G         | T           | 0.018                  | 0.007       | 0.022      | 0.061     | 0.053      |
| chr21      | 46,117,823  | rs61745911  | G         | A           | 0.037                  | 0.019       | 0.000      | 0.028     | 0.000      |
| chr22      | 30,888,494  | rs17738527  | C         | T           | 0.036                  | 0.022       | 0.040      | 0.203     | 0.230      |
| chr22      | 32,650,200  | rs2235171   | C         | T           | 0.040                  | 0.015       | 0.030      | 0.028     | 0.037      |

## Supplementary Table S5. Rare variants that were enriched in “tumor-paired normals” compared to “healthy normals” for stomach cancer

| Chromosome | Position    | dbSNP142    | Reference | Alternative | Minor allele frequency |             |            |           |            |
|------------|-------------|-------------|-----------|-------------|------------------------|-------------|------------|-----------|------------|
|            |             |             |           |             | KOVA:cancer            | KOVA:normal | 1000GP:EAS | TCGA:LUAD | 1000GP:EUR |
| chr1       | 19,566,382  | rs3850531   | A         | G           | 0.125                  | 0.060       | 0.056      | 0.004     | 0.000      |
| chr1       | 39,847,730  | rs79306726  | G         | A           | 0.158                  | 0.097       | 0.104      | 0.011     | 0.003      |
| chr1       | 75,097,426  | rs11210490  | G         | C           | 0.171                  | 0.108       | 0.114      | 0.438     | 0.527      |
| chr1       | 94,564,483  | rs6657239   | C         | T           | 0.053                  | 0.030       | 0.015      | 0.033     | 0.015      |
| chr1       | 150,958,836 | rs267733    | A         | G           | 0.112                  | 0.052       | 0.026      | 0.106     | 0.138      |
| chr1       | 167,780,071 | rs117021474 | C         | T           | 0.020                  | 0.007       | 0.009      | 0.004     | 0.001      |
| chr2       | 70,037,739  | rs2228202   | C         | G           | 0.118                  | 0.067       | 0.000      | 0.007     | 0.001      |
| chr2       | 160,310,246 | rs10202670  | A         | G           | 0.046                  | 0.019       | 0.013      | 0.142     | 0.115      |
| chr3       | 12,962,074  | rs35319679  | G         | A           | 0.204                  | 0.127       | 0.163      | 0.150     | 0.136      |
| chr3       | 52,390,789  | rs61734640  | C         | T           | 0.032                  | 0.019       | 0.019      | 0.033     | 0.056      |
| chr3       | 52,429,665  | rs419752    | C         | T           | 0.033                  | 0.019       | 0.000      | 0.036     | 0.000      |
| chr3       | 113,285,276 | rs2271496   | G         | A           | 0.145                  | 0.078       | 0.090      | 0.036     | 0.039      |
| chr3       | 113,720,517 | rs6784095   | T         | A           | 0.145                  | 0.093       | 0.069      | 0.099     | 0.089      |
| chr3       | 190,158,168 | rs35161724  | G         | C           | 0.013                  | 0.007       | 0.018      | 0.125     | 0.144      |
| chr4       | 5,830,296   | rs34611001  | C         | T           | 0.026                  | 0.004       | 0.022      | 0.015     | 0.023      |
| chr4       | 38,830,116  | rs3796508   | C         | T           | 0.039                  | 0.022       | 0.082      | 0.007     | 0.002      |
| chr4       | 96,091,414  | rs34585936  | C         | T           | 0.046                  | 0.026       | 0.035      | 0.011     | 0.021      |
| chr4       | 108,969,883 | rs4365796   | G         | A           | 0.033                  | 0.015       | 0.000      | 0.011     | 0.000      |
| chr5       | 79,029,594  | rs1019762   | T         | C           | 0.026                  | 0.004       | 0.000      | 0.165     | 0.002      |
| chr5       | 94,230,358  | rs9885412   | C         | T           | 0.086                  | 0.049       | 0.070      | 0.140     | 0.110      |
| chr5       | 140,558,212 | rs2950845   | A         | C           | 0.086                  | 0.052       | 0.091      | 0.131     | 0.144      |
| chr5       | 141,025,730 | rs77115131  | T         | G           | 0.039                  | 0.011       | 0.035      | 0.024     | 0.032      |
| chr5       | 154,346,296 | rs3749671   | G         | A           | 0.072                  | 0.037       | 0.053      | 0.040     | 0.040      |
| chr5       | 168,123,398 | rs2305993   | T         | C           | 0.020                  | 0.004       | 0.008      | 0.007     | 0.001      |
| chr6       | 26,091,179  | rs1799945   | C         | G           | 0.079                  | 0.030       | 0.001      | 0.172     | 0.000      |
| chr6       | 26,157,073  | rs2298090   | A         | G           | 0.026                  | 0.007       | 0.013      | 0.018     | 0.012      |
| chr6       | 29,395,057  | rs16894898  | T         | C           | 0.072                  | 0.022       | 0.030      | 0.004     | 0.000      |
| chr6       | 31,122,502  | rs130075    | C         | T           | 0.072                  | 0.045       | 0.038      | 0.099     | 0.042      |
| chr6       | 32,814,942  | rs1057149   | C         | T           | 0.013                  | 0.007       | 0.000      | 0.015     | 0.000      |
| chr7       | 44,104,788  | rs61756062  | A         | C           | 0.066                  | 0.019       | 0.039      | 0.011     | 0.004      |
| chr7       | 80,427,530  | rs1527482   | C         | T           | 0.086                  | 0.045       | 0.063      | 0.011     | 0.006      |
| chr7       | 129,663,496 | rs11556924  | C         | T           | 0.079                  | 0.026       | 0.005      | 0.347     | 0.000      |
| chr7       | 138,417,791 | rs3807153   | A         | G           | 0.053                  | 0.026       | 0.000      | 0.040     | 0.000      |
| chr8       | 6,794,400   | rs28661751  | C         | G           | 0.079                  | 0.049       | 0.067      | 0.004     | 0.009      |
| chr8       | 24,349,417  | rs3736281   | T         | C           | 0.033                  | 0.015       | 0.024      | 0.008     | 0.013      |
| chr9       | 2,820,046   | rs3736390   | G         | C           | 0.013                  | 0.004       | 0.000      | 0.004     | 0.000      |
| chr9       | 124,065,224 | rs2230287   | G         | A           | 0.197                  | 0.127       | 0.122      | 0.029     | 0.012      |
| chr9       | 125,659,716 | rs78926480  | C         | T           | 0.053                  | 0.015       | 0.045      | 0.004     | 0.003      |
| chr9       | 136,305,530 | rs28647808  | C         | G           | 0.020                  | 0.007       | 0.020      | 0.062     | 0.083      |
| chr10      | 94,714,427  | rs11187225  | C         | G           | 0.013                  | 0.004       | 0.004      | 0.077     | 0.102      |
| chr10      | 95,441,272  | rs11187583  | G         | A           | 0.020                  | 0.011       | 0.034      | 0.051     | 0.119      |
| chr10      | 105,840,422 | rs17116471  | T         | C           | 0.105                  | 0.060       | 0.039      | 0.004     | 0.000      |
| chr11      | 4,945,233   | rs35264256  | C         | T           | 0.020                  | 0.004       | 0.008      | 0.124     | 0.000      |
| chr11      | 10,647,995  | rs35468145  | G         | A           | 0.013                  | 0.007       | 0.007      | 0.062     | 0.038      |
| chr11      | 32,955,122  | rs2297781   | A         | G           | 0.105                  | 0.060       | 0.060      | 0.044     | 0.058      |
| chr11      | 58,034,651  | rs7111538   | C         | T           | 0.059                  | 0.030       | 0.040      | 0.018     | 0.015      |
| chr11      | 94,759,494  | rs16921260  | T         | C           | 0.079                  | 0.045       | 0.036      | 0.036     | 0.039      |
| chr12      | 6,980,442   | rs61733180  | G         | A           | 0.045                  | 0.015       | 0.040      | 0.004     | 0.000      |
| chr12      | 7,842,587   | rs2302516   | C         | G           | 0.046                  | 0.022       | 0.059      | 0.029     | 0.023      |
| chr12      | 15,038,703  | rs142330429 | G         | A           | 0.052                  | 0.015       | 0.031      | 0.004     | 0.004      |
| chr12      | 57,114,869  | rs17118953  | T         | C           | 0.013                  | 0.007       | 0.005      | 0.026     | 0.027      |
| chr14      | 91,671,124  | rs2295524   | G         | A           | 0.158                  | 0.071       | 0.212      | 0.102     | 0.091      |
| chr15      | 50,773,787  | rs3743044   | A         | G           | 0.125                  | 0.082       | 0.000      | 0.033     | 0.000      |
| chr15      | 99,671,765  | rs5030698   | G         | C           | 0.045                  | 0.011       | 0.021      | 0.091     | 0.059      |
| chr16      | 72,184,566  | rs35370634  | C         | T           | 0.013                  | 0.007       | 0.022      | 0.179     | 0.162      |
| chr16      | 81,211,496  | rs9935113   | C         | A           | 0.092                  | 0.060       | 0.105      | 0.175     | 0.171      |
| chr16      | 84,031,884  | rs2292329   | G         | C           | 0.112                  | 0.041       | 0.000      | 0.022     | 0.000      |
| chr17      | 8,243,598   | rs73250854  | C         | T           | 0.026                  | 0.011       | 0.000      | 0.113     | 0.000      |
| chr17      | 48,165,148  | rs146126922 | C         | G           | 0.013                  | 0.007       | 0.000      | 0.004     | 0.000      |
| chr18      | 11,889,467  | rs11872520  | C         | T           | 0.026                  | 0.015       | 0.025      | 0.007     | 0.003      |
| chr19      | 6,187,686   | rs17851960  | G         | A           | 0.046                  | 0.030       | 0.029      | 0.048     | 0.018      |
| chr19      | 11,348,960  | rs12609039  | G         | A           | 0.132                  | 0.056       | 0.070      | 0.078     | 0.052      |
| chr19      | 15,233,732  | rs59102460  | G         | A           | 0.138                  | 0.082       | 0.104      | 0.007     | 0.005      |
| chr19      | 24,310,413  | rs12611425  | G         | C           | 0.086                  | 0.041       | 0.000      | 0.062     | 0.000      |
| chr20      | 34,220,755  | rs11543244  | C         | T           | 0.066                  | 0.030       | 0.052      | 0.044     | 0.052      |
| chr20      | 60,909,316  | rs6062223   | C         | T           | 0.046                  | 0.019       | 0.000      | 0.026     | 0.001      |
| chr20      | 61,907,982  | rs11542296  | C         | T           | 0.033                  | 0.015       | 0.011      | 0.055     | 0.079      |
| chr21      | 31,692,277  | rs3804007   | G         | T           | 0.020                  | 0.007       | 0.022      | 0.036     | 0.053      |
| chr22      | 23,482,483  | rs35211242  | G         | A           | 0.046                  | 0.026       | 0.039      | 0.175     | 0.147      |
| chr22      | 24,761,467  | rs204718    | G         | A           | 0.039                  | 0.022       | 0.999      | 1.000     | 1.000      |
| chr22      | 32,650,200  | rs2235171   | C         | T           | 0.033                  | 0.015       | 0.030      | 0.015     | 0.037      |
| chr22      | 44,131,786  | rs3747203   | T         | C           | 0.165                  | 0.101       | 0.000      | 0.069     | 0.000      |

## Supplementary Table S6. ANNOVAR Databases Used for Functional Annotation

| Build | Table Name                                                                                                                                  | Table Explanation                                                                                                                                                                                                                                                             | Date     |
|-------|---------------------------------------------------------------------------------------------------------------------------------------------|-------------------------------------------------------------------------------------------------------------------------------------------------------------------------------------------------------------------------------------------------------------------------------|----------|
| hg19  | refGene                                                                                                                                     | FASTA sequences for all annotated transcripts in RefSeq Gene                                                                                                                                                                                                                  | 20150322 |
|       | snp138                                                                                                                                      | dbSNP with ANNOVAR index files                                                                                                                                                                                                                                                | 20140910 |
|       | avsnp142                                                                                                                                    | dbSNP142 with allelic splitting and left-normalization                                                                                                                                                                                                                        | 20141228 |
|       | avsnp147                                                                                                                                    | dbSNP147 with allelic splitting and left-normalization                                                                                                                                                                                                                        | 20160606 |
|       | 1000g2014oct<br>(1000g2014oct_all,<br>1000g2014oct_eur,<br>1000g2014oct_amr,<br>1000g2014oct_afr,<br>1000g2014oct_eas,<br>1000g2014oct_sas) | alternative allele frequency data in 1000 Genomes Project for autosomes (ALL, AFR (African), AMR (Admixed American), EAS (East Asian), EUR (European), SAS (South Asian)). Based on 201409 collection v5 (based on 201305 alignment) but including chrX and chrY data finally | 20141216 |
|       | esp6500siv2_all                                                                                                                             | alternative allele frequency in All subjects in the NHLBI-ESP project with 6500 exomes, including the indel calls and the chrY calls                                                                                                                                          | 20141222 |
|       | esp6500siv2_aa                                                                                                                              | alternative allele frequency in African American subjects in the NHLBI-ESP project with 6500 exomes, including the indel calls and the chrY calls                                                                                                                             | 20141222 |
|       | esp6500siv2_ea                                                                                                                              | alternative allele frequency in European American subjects in the NHLBI-ESP project with 6500 exomes, including the indel calls and the chrY calls                                                                                                                            | 20141222 |
|       | exac03                                                                                                                                      | ExAC 65000 exome allele frequency data for ALL, AFR (African), AMR (Admixed American), EAS (East Asian), FIN (Finnish), NFE (Non-finnish European), OTH (other), SAS (South Asian)). version 0.3. Left normalization done                                                     | 20150729 |
|       | popfreq_all_20150413                                                                                                                        | A database containing all allele frequency from 1000G, ESP6500, ExAC and CG46                                                                                                                                                                                                 | 20150413 |
|       | cosmic70                                                                                                                                    | COSMIC database version 68 on WGS data                                                                                                                                                                                                                                        | 20140911 |
|       | clinvar_20150629                                                                                                                            | CLINVAR database with Variant Clinical Significance (unknown, untested, non-pathogenic, probable-non-pathogenic, probable-pathogenic, pathogenic, drug-response, histocompatibility, other) and Variant disease name                                                          | 20150724 |
|       | nci60                                                                                                                                       | NCI-60 human tumor cell line panel exome sequencing allele frequency data                                                                                                                                                                                                     | 20130724 |
|       | ljb26_all                                                                                                                                   | whole-exome SIFT, PolyPhen2 HDIV, PolyPhen2 HVAR, LRT, MutationTaster, MutationAssessor, FATHMM, MetaSVM, MetaLR, VEST, CADD, GERP++, PhyloP and SiPhy scores from dbNSFP version 2.6                                                                                         | 20140925 |
